# Supplementary material for: MPO/HOCl Facilitates Apoptosis and Ferroptosis in the SOD1G93A Motor Neuron of Amyotrophic Lateral Sclerosis
Source: Hindawi journal article supplement (doi:10.1155/2022/8217663), 2022-01-01

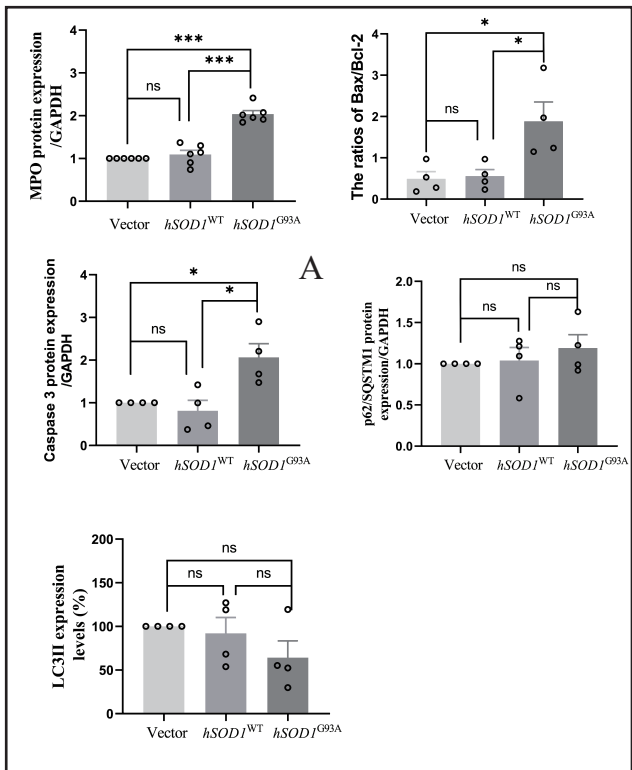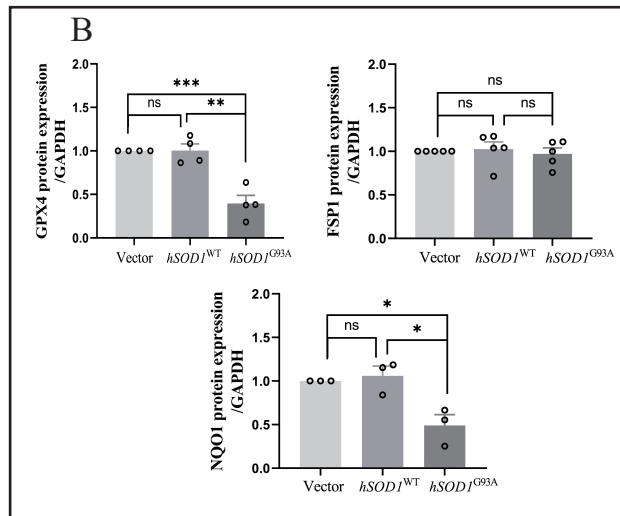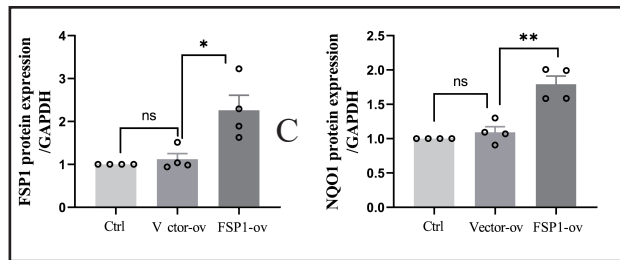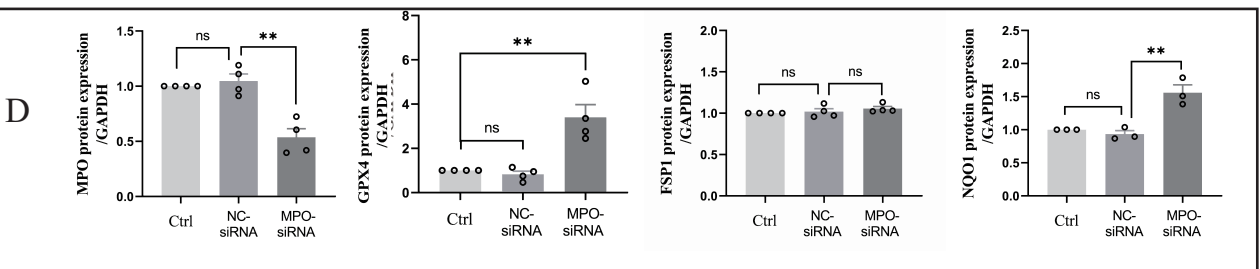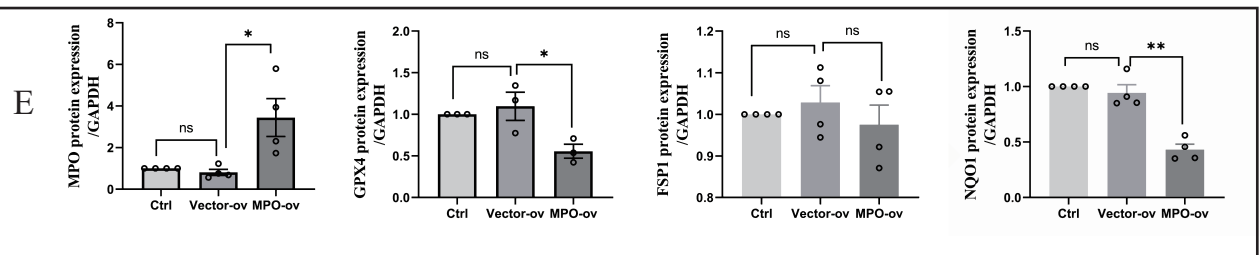

Supplement: f2 [file 8217663.f2.pdf]
