# Supplementary material for: MPO/HOCl Facilitates Apoptosis and Ferroptosis in the SOD1G93A Motor Neuron of Amyotrophic Lateral Sclerosis
Source: Hindawi journal article supplement (doi:10.1155/2022/8217663), 2022-01-01

# Male

A

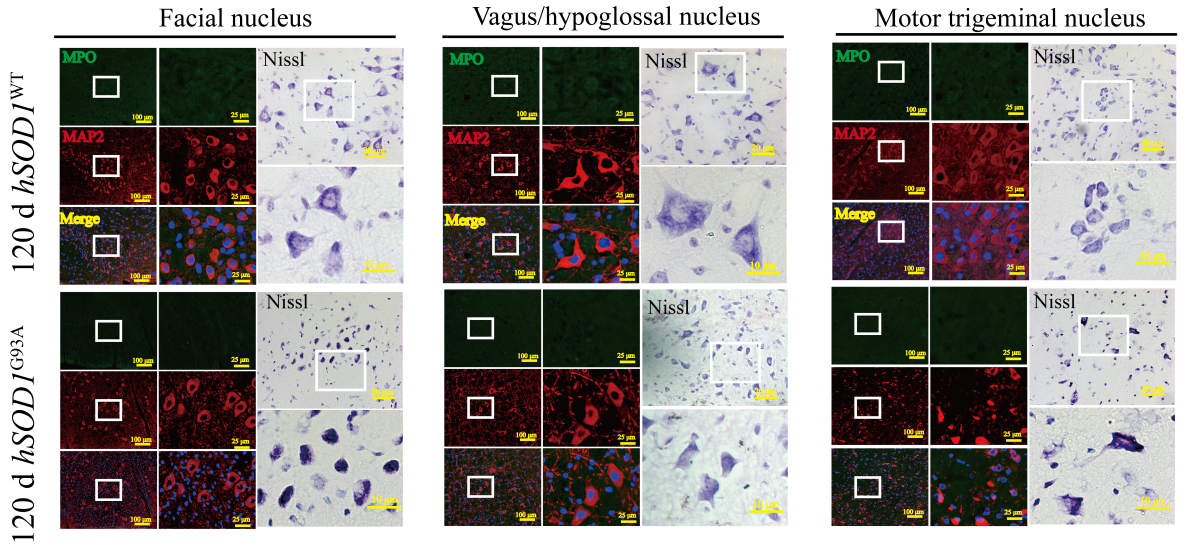

Supplement: f3 [file 8217663.f3.pdf]
