# Supplementary material for: MPO/HOCl Facilitates Apoptosis and Ferroptosis in the SOD1G93A Motor Neuron of Amyotrophic Lateral Sclerosis
Source: Hindawi journal article supplement (doi:10.1155/2022/8217663), 2022-01-01

Male

Female

A

60 d

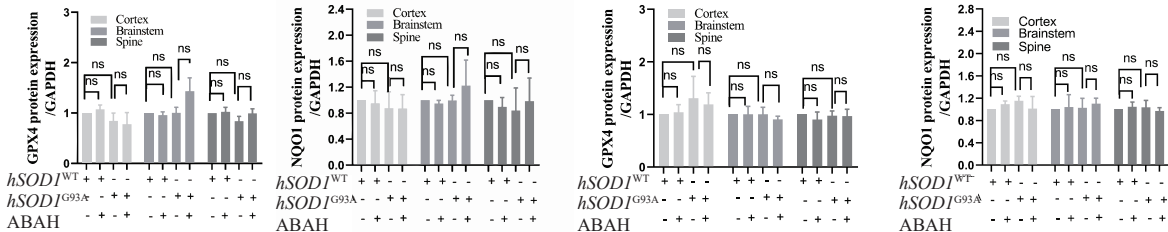

B 90 d

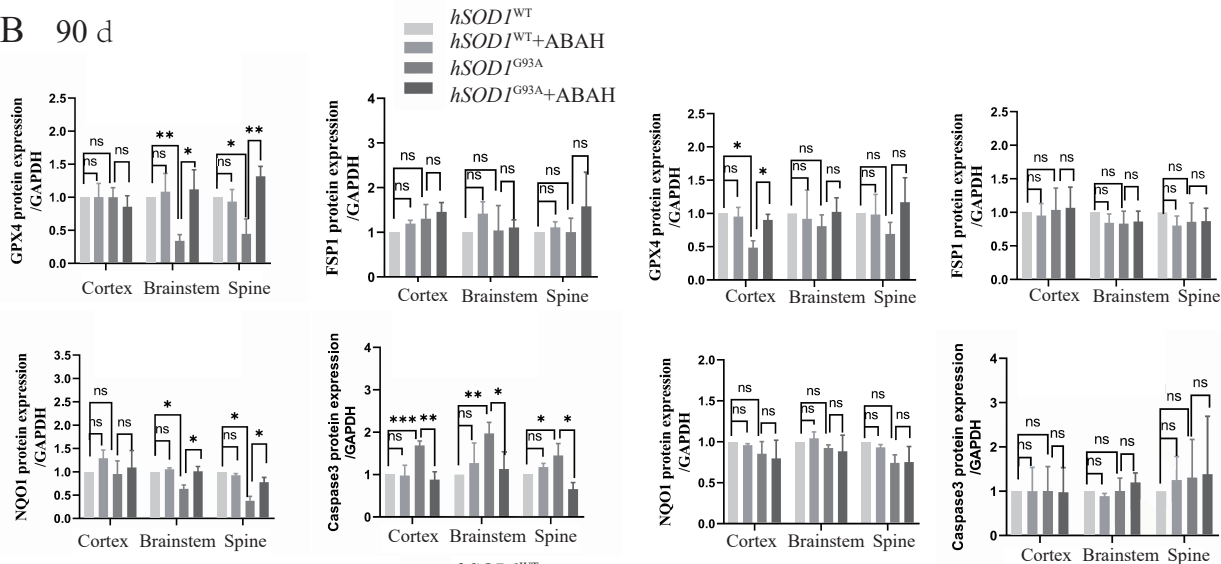

C 120 d

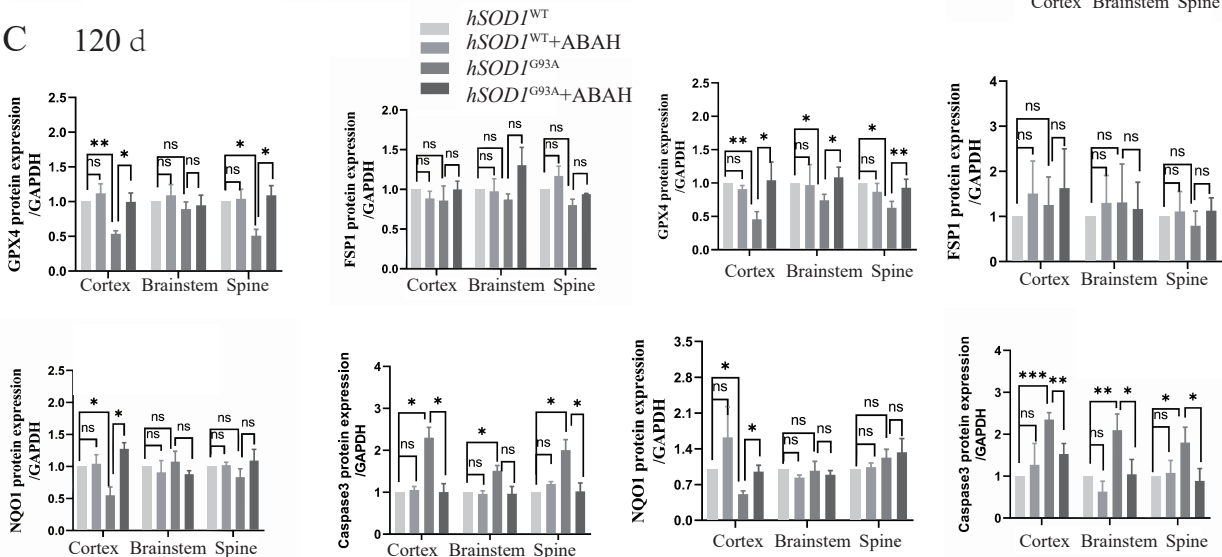

Supplement: f4 [file 8217663.f4.pdf]
